# Supplementary material for: Clinical Efficacy and Tumor Microenvironment Influence in a Dose-Escalation Study of Anti-CD19 Chimeric Antigen Receptor T Cells in Refractory B-Cell Non-Hodgkin's Lymphoma
Source: Oxford University Press journal article supplement (doi:10.1158/1078-0432.ccr-19-0101), 2019-08-23
Supplement: 10780432ccr190101-sup-215156_4_supp_5669039_pv6y6j.docx [file 10780432ccr190101-sup-215156_4_supp_5669039_pv6y6j.docx]

**Supplementary Table S1: The sequences of PCR primers.**

| Primers | Sequence |
| --- | --- |
| CD14-F | CAACCTAGAGCCGTTTCTAAAGC |
| CD14-R | GCGCCTACCAGTAGCTGAG |
| CD68-F | CTTCTCTCATTCCCCTATGGACA |
| CD68-R | GAAGGACACATTGTACTCCACC |
| CD163-F | GCGGGAGAGTGGAAGTGAAAG |
| CD163-R | GTTACAAATCACAGAGACCGCT |
| MRC1-F | GGGTTGCTATCACTCTCTATGC |
| MRC1-R | TTTCTTGTCTGTTGCCGTAGTT |
| CD28-F | CTATTTCCCGGACCTTCTAAGCC |
| CD28-R | GCGGGGAGTCATGTTCATGTA |
| ICOS-F | CTGGTTACCCATAGGATGTGC |
| ICOS-R | TGGCTGTGTTCACTGCTCTC |
| B3GAT1-F | CCGACGACGACAACACCTAC |
| B3GAT1-R | CTTCCAGCCGACCACCTTC |
| IL2Ra-F | CGCAGAATAAAAAGCGGGTCA |
| IL2Ra-R | ACTTGTTTCGTTGTGTTCCGA |
| TBX21-F | GGTTGCGGAGACATGCTGA |
| TBX21-R | GTAGGCGTAGGCTCCAAGG |
| EOMES-F | TTCCACCGCCACCAAACTG |
| EOMES-R | AGCACCACCTCTACGAACAC |
| TNFRSF9-F | AGCTGTTACAACATAGTAGCCAC |
| TNFRSF9-R | GGACAGGGACTGCAAATCTGAT |
| PD1-F | CCAAGGCGCAGATCAAAGAGA |
| PD1-R | AGGACCCAGACTAGCAGCA |
| HAVCR2-F | AGACAGTGGGATCTACTGCTG |
| HAVCR2-R | CCTGGTGGTAAGCATCCTTGG |
| LAG3-F | GGGACCTACACCTGCCATATC |
| LAG3-R | ACTGGAGTCACCTCACAAAGC |
| TIGIT-F | TCTGCATCTATCACACCTACCC |
| TIGIT-R | CCACCACGATGACTGCTGT |
| CTLA4-F | CCCACCGCCATACTACCTG |
| CTLA4-R | AAACAACCCCGAACTAACTGC |
| CD160-F | AGGCTGAGGGGTTTGTAGTG |
| CD160-R | GGTGTGACTTGGCTTATGGTG |
